# Supplementary material for: A Factorial Validation of Parental Mediation Strategies with Regard to Internet Use
Source: PubMed Central journal article supplement (PMC6194521; doi:10.5334/pb.372), 2017-06-26
Supplement: pb-57-2-372-s1.pdf [file pb-57-2-372-s1.pdf]

Appendix 1. Description of parental mediation items from the perspective of the child, the mother and the father

|                                                          | Child         | Mother        | Father        |
|----------------------------------------------------------|---------------|---------------|---------------|
|                                                          | <i>M</i> (SD) | <i>M</i> (SD) | <i>M</i> (SD) |
| How often... (scale 1 – 5)                               |               |               |               |
| Logging in to child's profile to read messages           | 1.37 (.892)   | 1.78 (1.014)  | 1.50 (0.839)  |
| Checking child's SN page                                 | 2.41 (1.196)  | 2.74 (1.198)  | 2.09 (1.129)  |
| Checking added contacts to child's SN                    | 1.43 (0.882)  | 2.04 (1.060)  | 1.63 (0.927)  |
| Watching when the child uses the I                       | 1.74 (0.867)  | 2.55 (1.006)  | 2.12 (0.948)  |
| Helping the child using the I                            | 2.14 (1.043)  | 2.54 (0.963)  | 2.41 (0.913)  |
| Being around when the child uses the I                   | 3.31 (1.173)  | 3.24 (1.151)  | 2.75 (1.186)  |
| Engagement in or having rules about... (yes/no)          | Child         | Mother        | Father        |
|                                                          | % yes         | % yes         | % yes         |
| Software to limit I access in time                       | 3.5%          | 6.7%          | 6.0%          |
| Software to block access to certain websites             | 14.1%         | 14.1%         | 13.7%         |
| Discussed that not everything online is true             | 88.7%         | 96.0%         | 90.6%         |
| Discussed the potential dangers of the I                 | 85.9%         | 97.2%         | 90.2%         |
| Rules about the time the child can spend online          | 34.7%         | 42.6%         | 42.0%         |
| Rules about the times of the day the child can be online | 58.0%         | 70.7%         | 58.7%         |
| Rules about the use of the I in the bedroom              | 47.1%         | 64.8%         | 59.6%         |
| Rules about the pictures the child can post online       | 43.7%         | 64.3%         | 56.1%         |
| Rules about the information the child can share          | 50.6%         | 64.9%         | 55.6%         |
| Rules about with whom the child can chat                 | 26.3%         | 49.2%         | 38.4%         |
| Rules about who the child can add to the SN              | 35.5%         | 52.3%         | 40.7%         |
| Being friends with a parent/with the child on the SN*    | 77.4%         | 70.3%         | 59.7%         |
| Parents have access to the child's SN login credentials* | 39.7%         | 52.8%         | 47.7%         |

SN = social network; I = internet; \* not included in factor analyses
